# Supplementary material for: A novel platform for detection of protooncogene based on Au nanocluster enhanced fluorescence
Source: Royal Society of Chemistry journal article supplement (doi:10.1039/c4ay02117g), 2014-11-05
Supplement: c4ay02117g1.pdf [file c4ay02117g1.pdf]

1

## Supporting information

2 **A novel platform for detection of protooncogene based on**

3 **Au nanoclusters enhanced fluorescence**

4 **Kang Mao<sup>a</sup>, Yizhen Liu<sup>a,b</sup>, Yinran Chen<sup>a</sup>, Zitong Wu<sup>a</sup>, Xiaodong Zhou<sup>\*a</sup>, Aiguo Shen<sup>a</sup>**  
5 **and Jiming Hu,<sup>a</sup>**

6 *a Key Laboratory of Analytical Chemistry for Biology and Medicine (Ministry of Education), College of Chemistry and*  
7 *Molecular Sciences, Wuhan University, Wuhan, 430072, China.*

8 *b College of Chemistry and Chemical Engineering, Shenzhen University, Shenzhen 518060, Guangdong, China*

9 *\*Corresponding author. Tel.: +86 027 68752439-8116*

10 *E-mail: [zhouxd@whu.edu.cn](mailto:zhouxd@whu.edu.cn)*

11

12

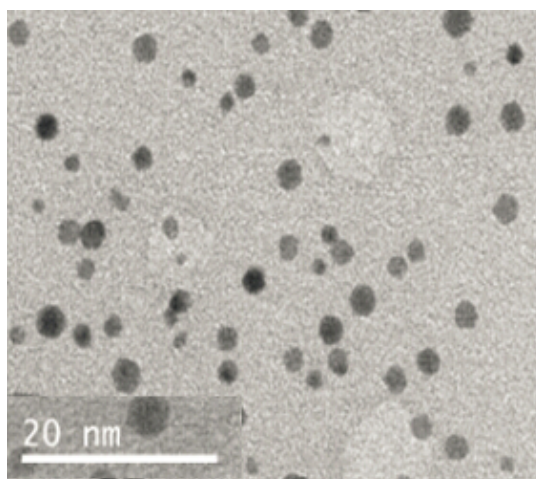

13

14

15

Figure S1. TEM image of AuNCs@BSA
